# Supplementary material for: Fe–Cu–chloride ionic liquid immobilized SBA-15 for solvent-free oxidation of styrene to benzaldehyde with H2O2
Source: Royal Society of Chemistry journal article supplement (doi:10.1039/d4nj00003j), 2024-01-01
Supplement: d4nj00003j1.pdf [file d4nj00003j1.pdf]

## Supporting information

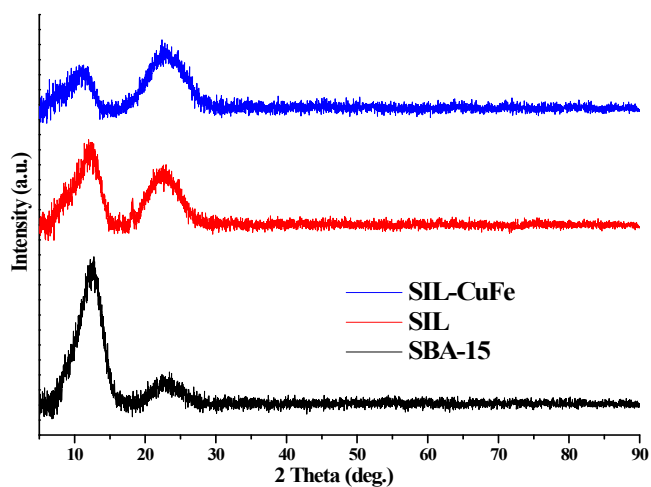

**Fig. S1** Wide-angle XRD patterns of SBA-15, SIL and SIL-CuFe

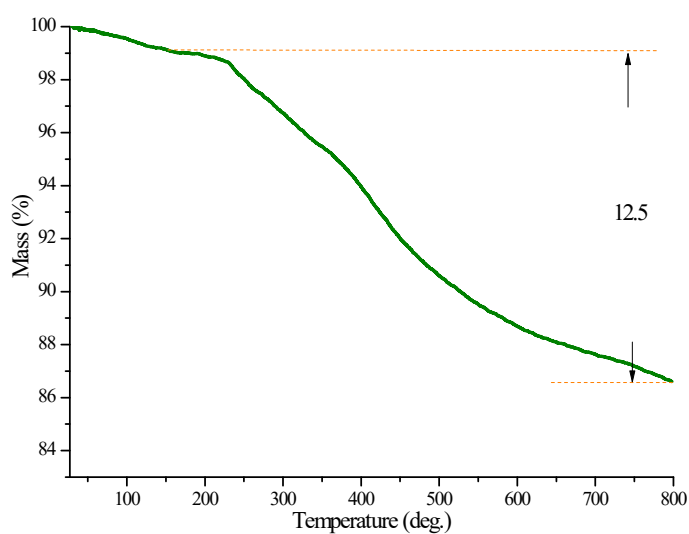

**Fig. S2** TG curve of SIL-CuFe sample

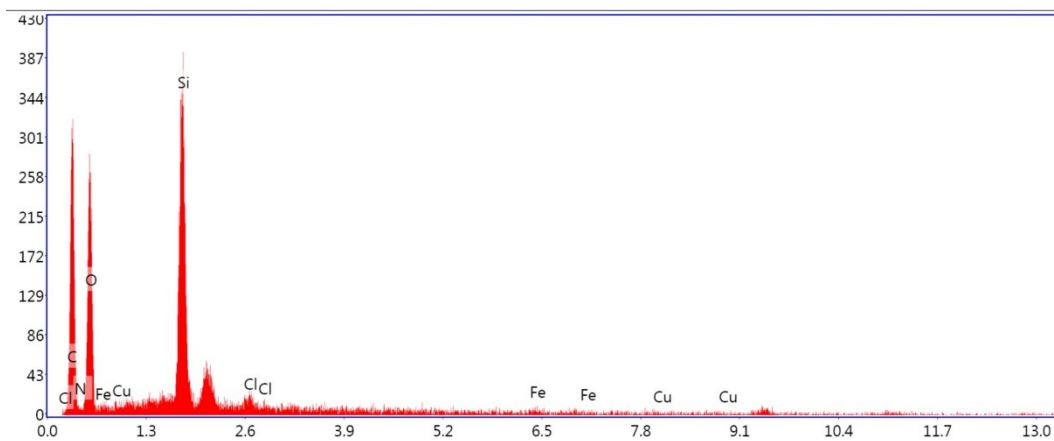

**Fig. S3** EDX spectrum of SIL-CuFe

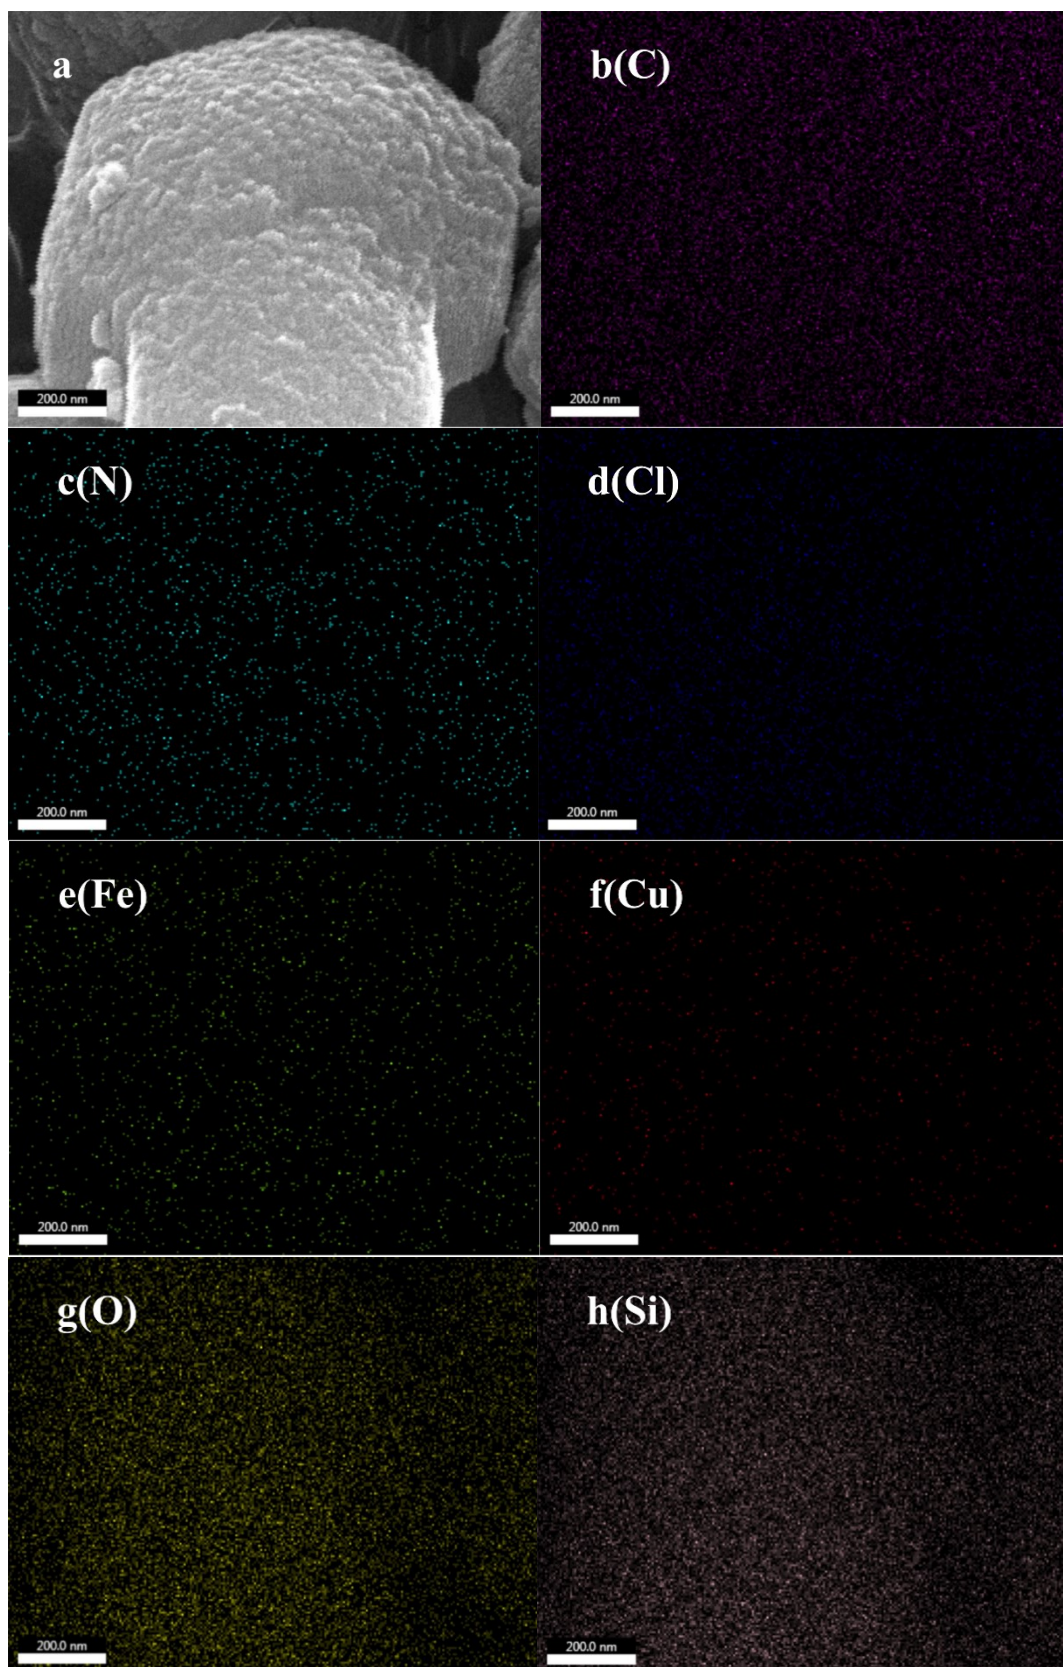

**Fig. S4** Elemental mapping of SIL-CuFe

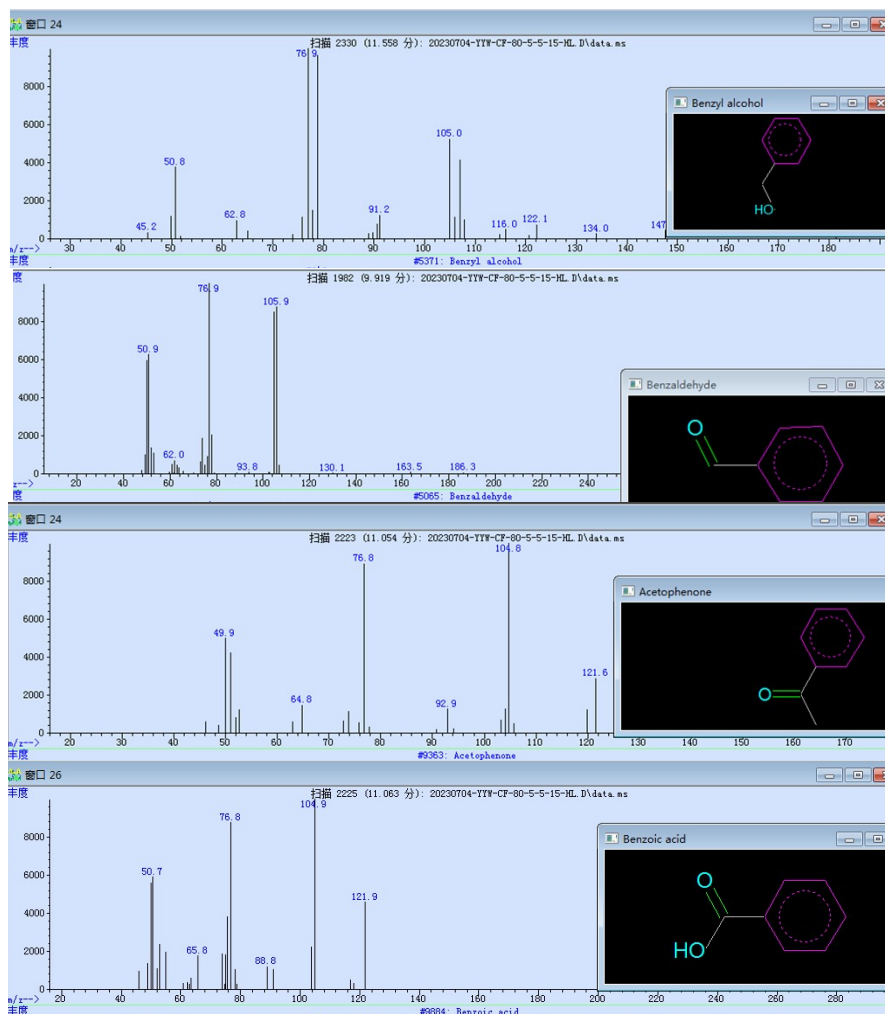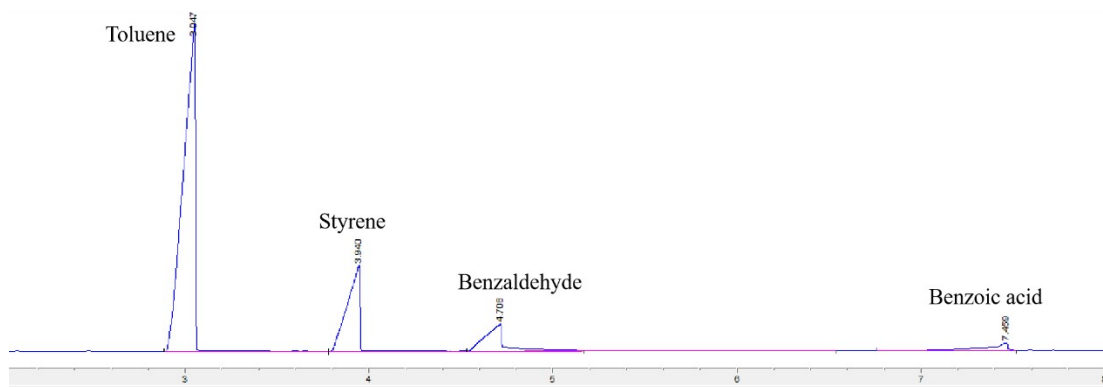

Fig. S5 GC and MS chromatograms of the products

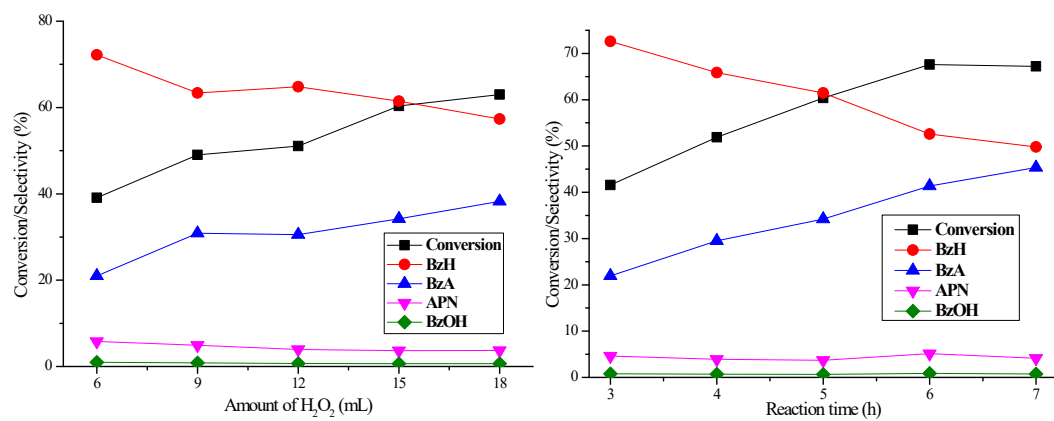

Fig. S6 catalytic performance versus amount of H<sub>2</sub>O<sub>2</sub> and reaction time at 80 °C

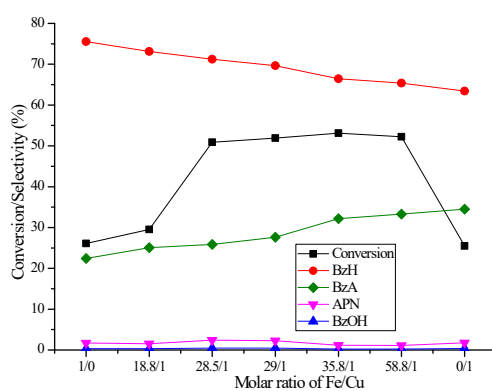

Fig. S7 catalytic performance versus molar ratio of Fe/Cu at 70 °C

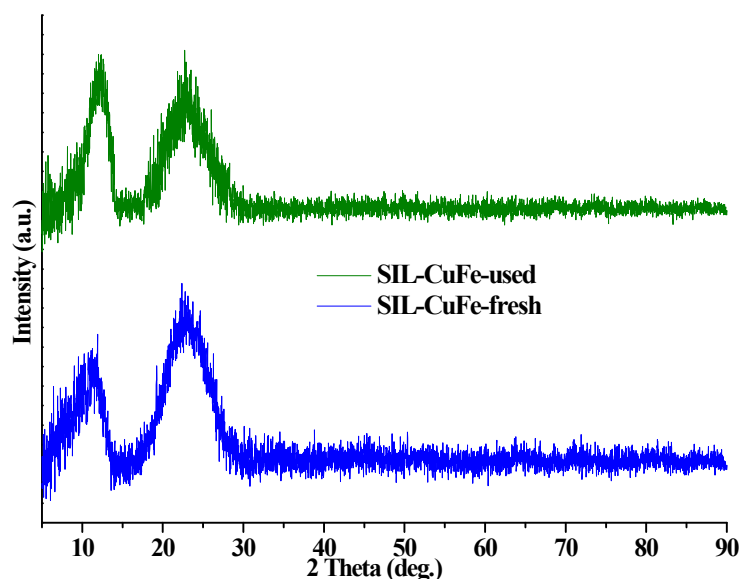

**Fig. S8** wide-angle XRD patterns of fresh and used catalyst

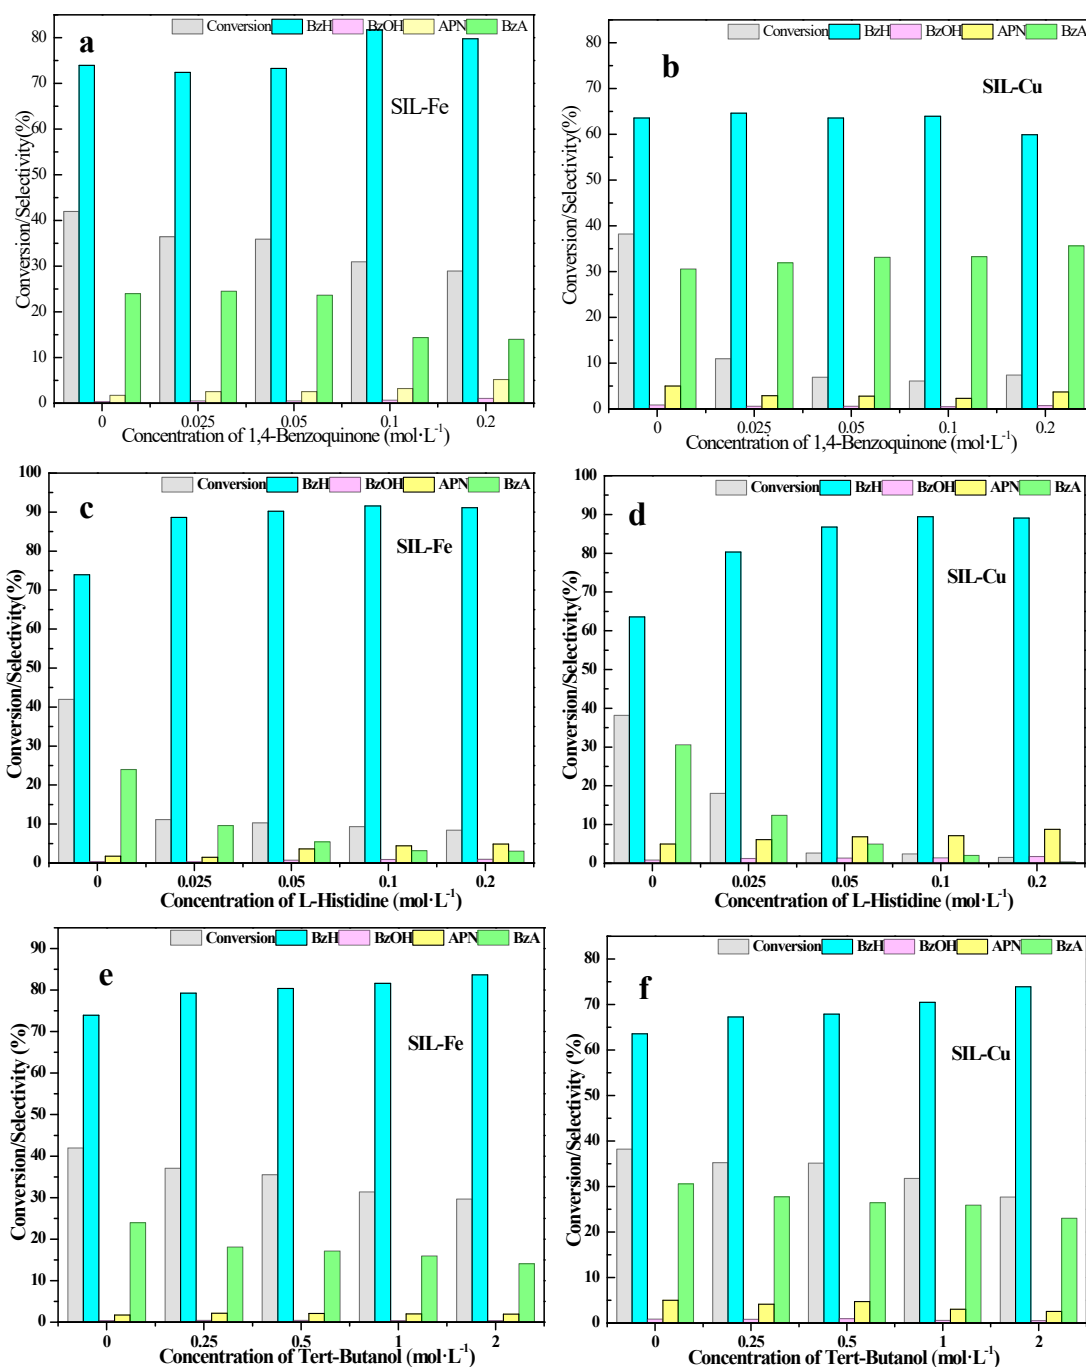

**Fig. S9** quenching experiments of SIL-Fe (a,c,e) and SIL-Cu (b,d,f)

**Table S1** The results of ICP method

| Elements | Conc (ppm ) | Content of metals (mmol/g) | Fe:Cu  |
|----------|-------------|----------------------------|--------|
| Fe       | 0.563       | 0.102                      | 18.8/1 |
| Cu       | 0.034       | 0.005                      |        |
| Fe       | 1.583       | 0.285                      | 28.5/1 |
| Cu       | 0.0632      | 0.010                      |        |
| Fe       | 0.484       | 0.087                      | 29.1/1 |
| Cu       | 0.019       | 0.003                      |        |
| Fe       | 1.529       | 0.276                      | 35.8/1 |
| Cu       | 0.049       | 0.008                      |        |
| Fe       | 1.239       | 0.223                      | 58.7/1 |
| Cu       | 0.024       | 0.004                      |        |
